# Supplementary material
Source: PubMed Central journal article supplement (PMC4164491)
Supplement: epi-9-1061-s01.pdf [file epi-9-1061-s01.pdf]

## **Supplemental Material to:**

**Gilles Maussion, Jennie Yang, Matthew Suderman,  
Alpha Diallo, Corina Nagy, Mitchell Arnovitz,  
Naguib Mechawar, and Gustavo Turecki**

**Functional DNA methylation in a transcript specific  
3' UTR region of TrkB associates with suicide**

**Epigenetics 2014; 9(8)**

**<http://dx.doi.org/10.4161/epi.29068>**

**[http://www.landesbioscience.com/journals/epigenetics/  
article/29068/](http://www.landesbioscience.com/journals/epigenetics/article/29068/)**



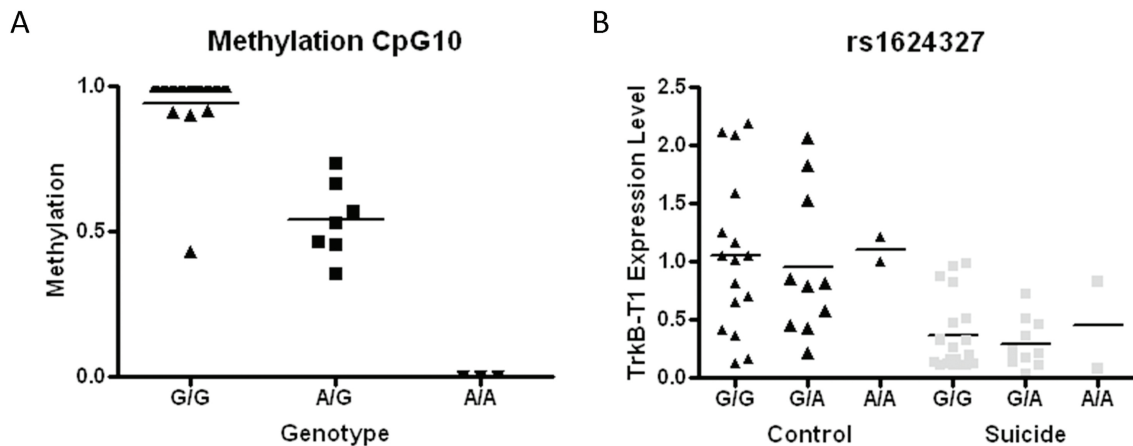

Genotypes and expression levels of TrkB-T1 related to the rs1624327 SNP.

A: Genotype of the initial cohort (13 controls and 11 suicide completers) and the extended cohort (28 controls and 33 suicide completers for the rs1624327)

B: TrkB-T1 expression levels in frontal cortex of controls and suicide completers rearranged by genotypes at the rs1624327.

Supplementary Table 1

Pairwise comparison of methylation levels independently from the groups, between CpG 6 7

8 and 9

| (I) CpG | (J) CpG | Mean Difference (I-J) | Std. Error | df     | Sig.  | 95% Confidence Interval for Difference |             |
|---------|---------|-----------------------|------------|--------|-------|----------------------------------------|-------------|
|         |         |                       |            |        |       | Lower Bound                            | Upper Bound |
| 6       | 7       | .635*                 | .038       | 34.712 | .000  | .527                                   | .742        |
|         | 8       | .030                  | .030       | 41.263 | 1.000 | -.053                                  | .113        |
|         | 9       | .009                  | .031       | 41.031 | 1.000 | -.076                                  | .094        |
| 7       | 6       | -.635*                | .038       | 34.712 | .000  | -.742                                  | -.527       |
|         | 8       | -.604*                | .041       | 38.909 | .000  | -.717                                  | -.491       |
|         | 9       | -.625*                | .041       | 39.421 | .000  | -.740                                  | -.511       |
| 8       | 6       | -.030                 | .030       | 41.263 | 1.000 | -.113                                  | .053        |
|         | 7       | .604*                 | .041       | 38.909 | .000  | .491                                   | .717        |
|         | 9       | -.021                 | .033       | 43.269 | 1.000 | -.113                                  | .071        |
| 9       | 6       | -.009                 | .031       | 41.031 | 1.000 | -.094                                  | .076        |
|         | 7       | .625*                 | .041       | 39.421 | .000  | .511                                   | .740        |
|         | 8       | .021                  | .033       | 43.269 | 1.000 | -.071                                  | .113        |

The statistics were corrected for multiple testing according Bonferonni method

p<0.05

Supplementary Table 2

Supplementary Table 2A: Descriptive statistics of TrkB-T1 expression level in groups and genotypes

| Group   | Genotype | Mean  | Std. Error | df     | 95% Confidence Interval |             |
|---------|----------|-------|------------|--------|-------------------------|-------------|
|         |          |       |            |        | Lower Bound             | Upper Bound |
| Control | G/G      | .993  | .126       | 31.325 | .736                    | 1.250       |
|         | G/A      | .916  | .150       | 19.293 | .603                    | 1.229       |
|         | A/A      | 1.095 | .253       | 1.777  | -.135                   | 2.325       |
| Suicide | G/G      | .287  | .113       | 31.415 | .056                    | .517        |
|         | G/A      | .285  | .140       | 18.838 | -.007                   | .578        |
|         | A/A      | .464  | .243       | 1.543  | -.941                   | 1.868       |

Supplementary Table 2B: Statistics of the comparison of TrkB-T1 expression inside control and suicide group in between genotypes.

| Group   | (I)<br>Genotype | (J)<br>Genotype | Mean<br>Difference (I-J) | Std. Error | df     | Sig.  | 95% Confidence Interval for<br>Difference |             |
|---------|-----------------|-----------------|--------------------------|------------|--------|-------|-------------------------------------------|-------------|
|         |                 |                 |                          |            |        |       | Lower Bound                               | Upper Bound |
| Control | G/G             | G/A             | .077                     | .196       | 43.397 | 1.000 | -.412                                     | .566        |
|         |                 | A/A             | -.102                    | .282       | 2.770  | 1.000 | -1.572                                    | 1.369       |
|         | G/A             | G/G             | -.077                    | .196       | 43.397 | 1.000 | -.566                                     | .412        |
|         |                 | A/A             | -.179                    | .304       | 3.466  | 1.000 | -1.498                                    | 1.140       |
|         | A/A             | G/G             | .102                     | .282       | 2.770  | 1.000 | -1.369                                    | 1.572       |
|         |                 | G/A             | .179                     | .304       | 3.466  | 1.000 | -1.140                                    | 1.498       |
| Suicide | G/G             | G/A             | .001                     | .181       | 41.697 | 1.000 | -.450                                     | .453        |
|         |                 | A/A             | -.177                    | .268       | 2.322  | 1.000 | -1.864                                    | 1.510       |
|         | G/A             | G/G             | -.001                    | .181       | 41.697 | 1.000 | -.453                                     | .450        |
|         |                 | A/A             | -.179                    | .278       | 2.597  | 1.000 | -1.724                                    | 1.367       |
|         | A/A             | G/G             | .177                     | .268       | 2.322  | 1.000 | -1.510                                    | 1.864       |
|         |                 | G/A             | .179                     | .278       | 2.597  | 1.000 | -1.367                                    | 1.724       |
